# Supplementary material for: Modeling Coding Intensity of Procedures in a U.S. Population-Based Hip/Knee Arthroplasty Inpatient Cohort Adjusting for Patient- and Facility-Level Characteristics
Source: MDPI journal article supplement (doi:10.3390/healthcare10081368), 2022-07-23

## SUPPLEMENTARY MATERIALS

|            |                                                                                                                                                                                                                  |    |
|------------|------------------------------------------------------------------------------------------------------------------------------------------------------------------------------------------------------------------|----|
| Table S1   | MS-DRG codes related to hip/knee arthroplasty procedures                                                                                                                                                         | 2  |
| Table S2   | Results of a multivariate linear regression of excess coding intensity against facility ID for all patient-visits of a stratum of facilities with equal facility-level characteristics (N= 2,058 patient-visits) | 3  |
| Figure S1  | Histogram of length of stay (days)                                                                                                                                                                               | 4  |
| Figure S2  | Histogram of log length of stay                                                                                                                                                                                  | 5  |
| Figure S3  | Effect plot of excess coding intensity by facility ID for facilities that share the same facility-level characteristics                                                                                          | 6  |
| Figure S4  | Effect plot of excess coding intensity by admission month                                                                                                                                                        | 7  |
| Figure S5  | Effect plot of excess coding intensity by facility urban/rural status                                                                                                                                            | 8  |
| Figure S6  | Effect plot of excess coding intensity by facility ownership                                                                                                                                                     | 9  |
| Figure S7  | Effect plot of excess coding intensity by facility case mix index (CMI)                                                                                                                                          | 10 |
| Figure S8  | Effect plot of excess coding intensity by facility teaching status                                                                                                                                               | 11 |
| Figure S9  | Effect plot of excess coding intensity by facility academic status                                                                                                                                               | 12 |
| Figure S10 | Effect plot of excess coding intensity by facility U.S. Census regional division                                                                                                                                 | 13 |
| Figure S11 | Effect plot of excess coding intensity by facility bed count                                                                                                                                                     | 14 |
| Figure S12 | Heatmap of AEI seasonality by admission month and facility region based on the U.S. Census Bureau definition of 9 regional divisions                                                                             | 15 |
| Figure S13 | Effect plot of adjusted excess coding intensity (AEI) by facility                                                                                                                                                | 16 |
| Figure S14 | Sorted dot plot of adjusted excess coding intensity (AEI) across facilities                                                                                                                                      | 17 |

Table S1: MS-DRG codes related to hip/knee arthroplasty procedures.

| <b>MS-DRG Code</b> | <b>MS-DRG Description</b>                                                                                    |
|--------------------|--------------------------------------------------------------------------------------------------------------|
| 461                | Bilateral or Multiple Major Joint Procedures of Lower Extremity with Major Complication or Comorbidity (MCC) |
| 462                | Bilateral or Multiple Major Joint Procedures of Lower Extremity without MCC                                  |
| 466                | Revision of Hip or Knee Replacement with MCC                                                                 |
| 467                | Revision of Hip or Knee Replacement with CC                                                                  |
| 468                | Revision of Hip or Knee Replacement without CC/MCC                                                           |
| 469                | Major Hip and Knee Joint Replacement or Reattachment of Lower Extremity with MCC or Total Ankle Replacement  |
| 470                | Major Hip and Knee Joint Replacement or Reattachment of Lower Extremity without MCC                          |

Table S2. Results of a multivariate linear regression of excess coding intensity against facility ID for all patient-visits of a stratum of facilities with equal facility-level characteristics (N= 2,058 patient-visits)

| Coefficients    | Estimate | Std. Error | t statistic | p-value  |
|-----------------|----------|------------|-------------|----------|
| (Intercept)     | -0.15    | 0.03       | -4.65       | <0.0001  |
| Facility ID 115 | -0.12    | 0.04       | -2.80       | 0.0051   |
| Facility ID 290 | 0.12     | 0.06       | 2.08        | 0.0378   |
| Facility ID 671 | 0.56     | 0.04       | 14.00       | < 0.0001 |

---

Residual standard error: 0.6848 on 2054 degrees of freedom

---

Multiple R-squared: 0.162

---

Reference group: Facility ID 78. Common values of facility characteristics: 2 (CMI); No (teaching status); No (academic status); Urban (urban/rural status); Voluntary Non-profit - Private (ownership status); 0-100 (bed count); South Atlantic (Census regional division).

Figure S1. Histogram of length of stay (days)

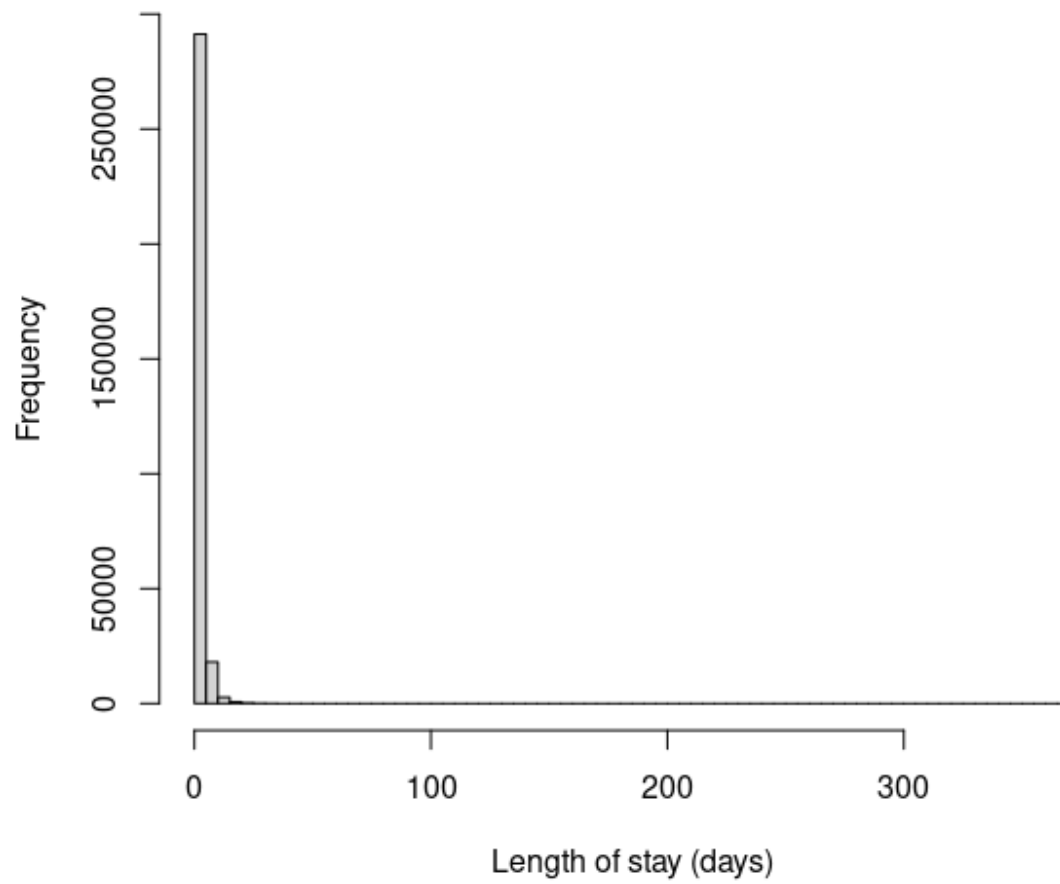

Figure S2. Histogram of log length of stay

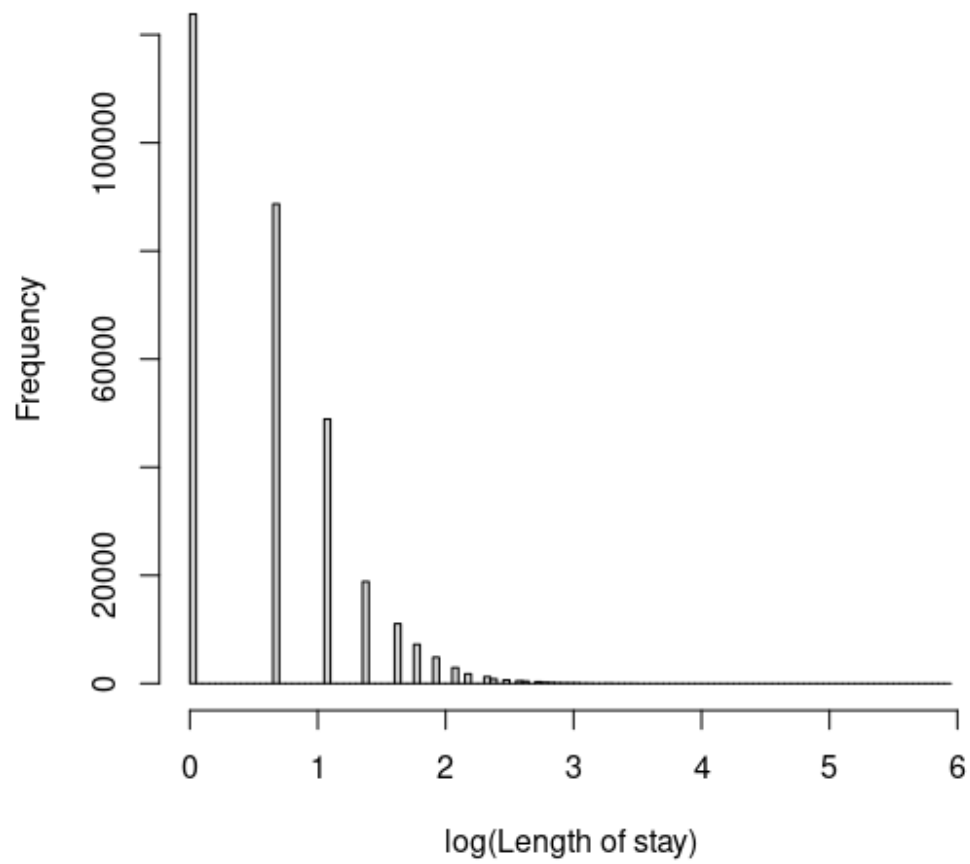

Figure S3. Effect plot of excess coding intensity by facility ID for facilities that share the same facility-level characteristics

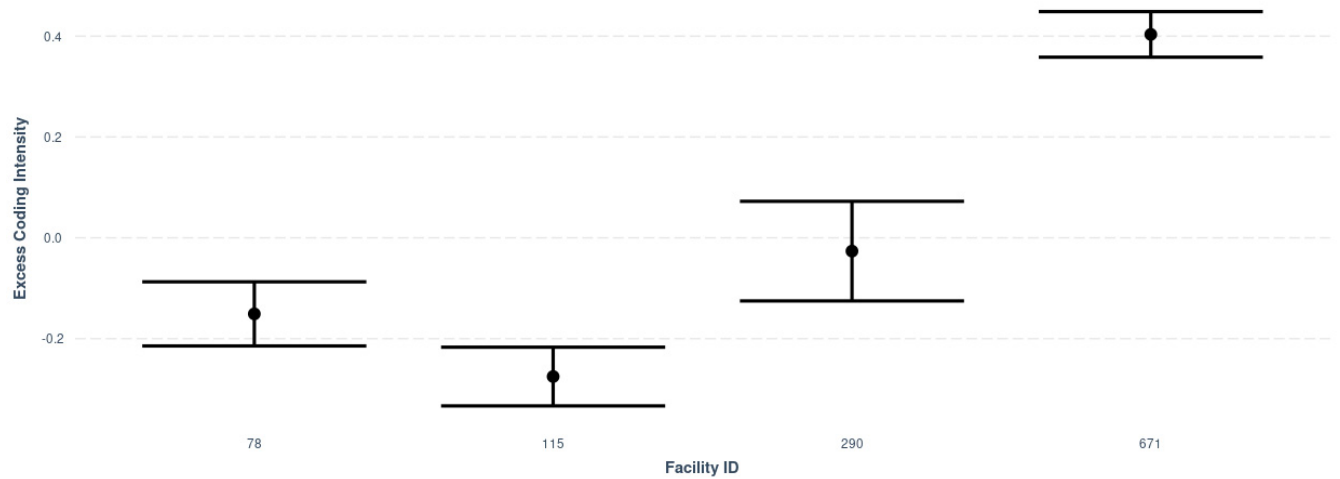

Figure S4. Effect plot of excess coding intensity by admission month

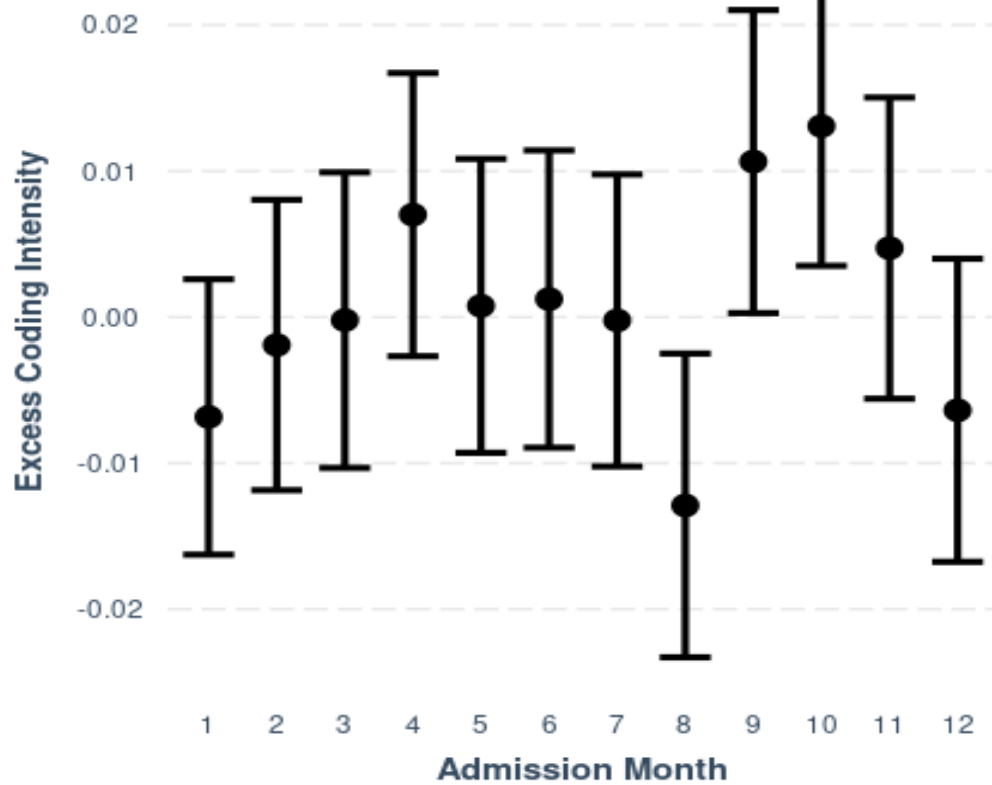

Figure S5. Effect plot of excess coding intensity by facility urban/rural status

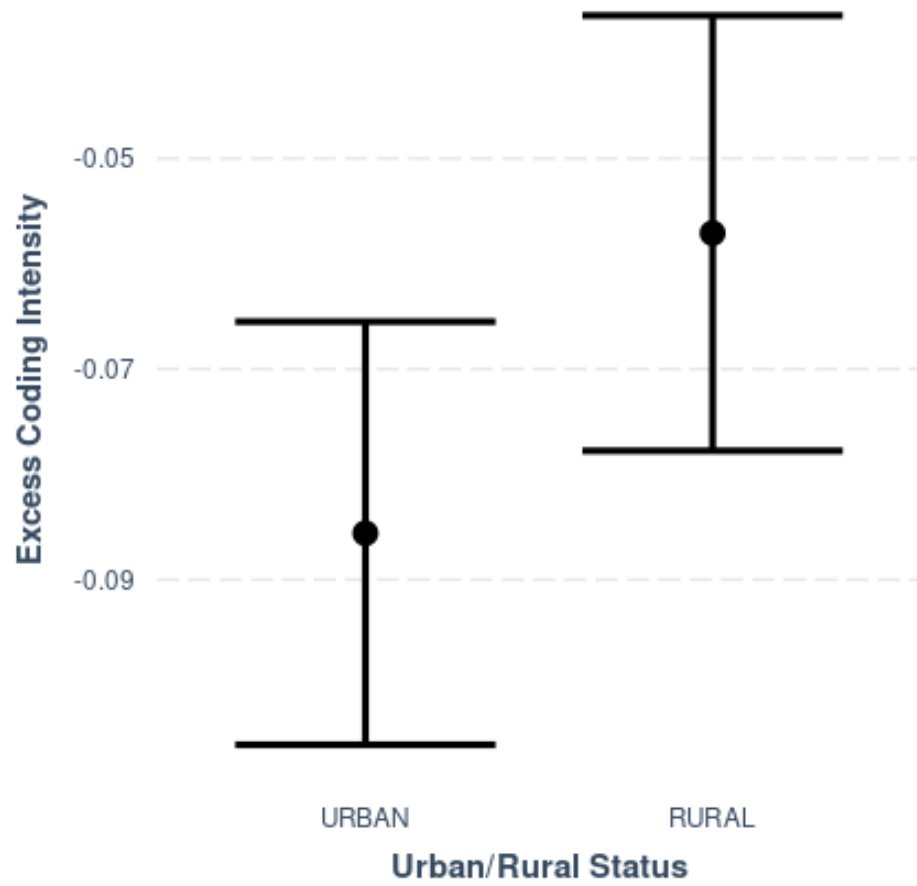



Figure S6. Effect plot of excess coding intensity by facility ownership

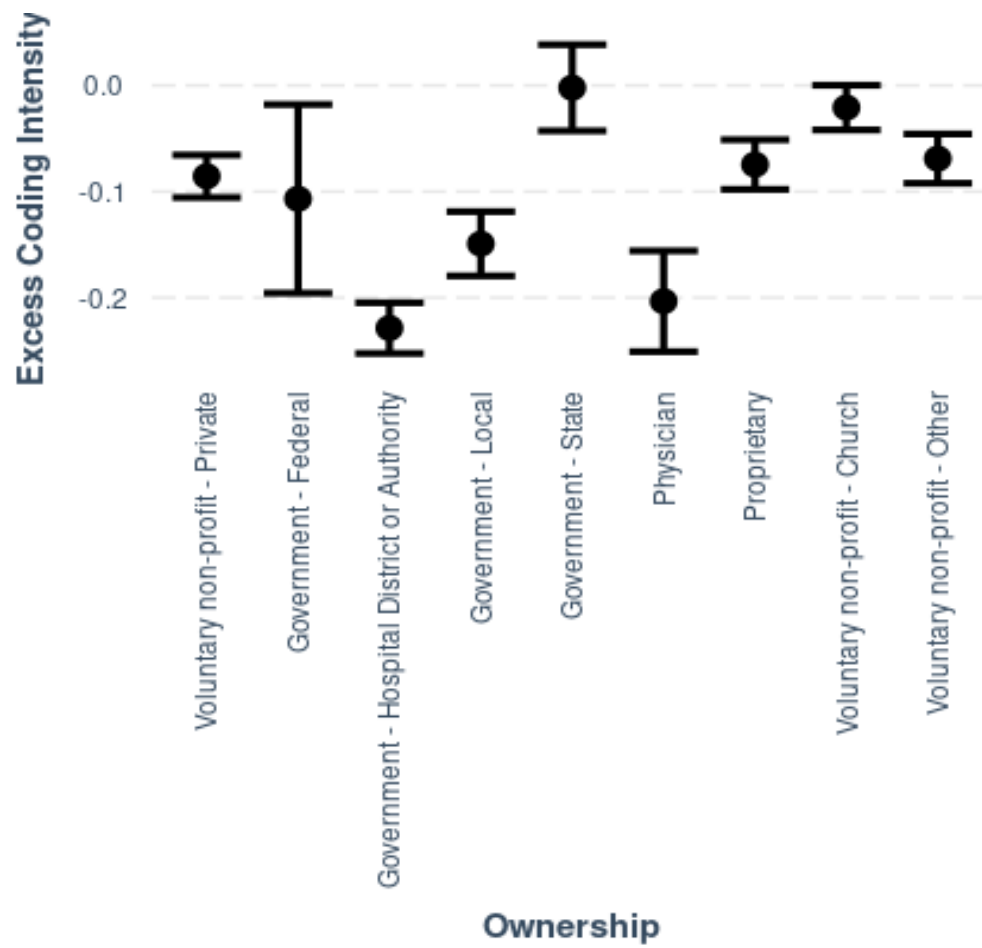

Figure S7. Effect plot of excess coding intensity by facility case mix index (CMI)

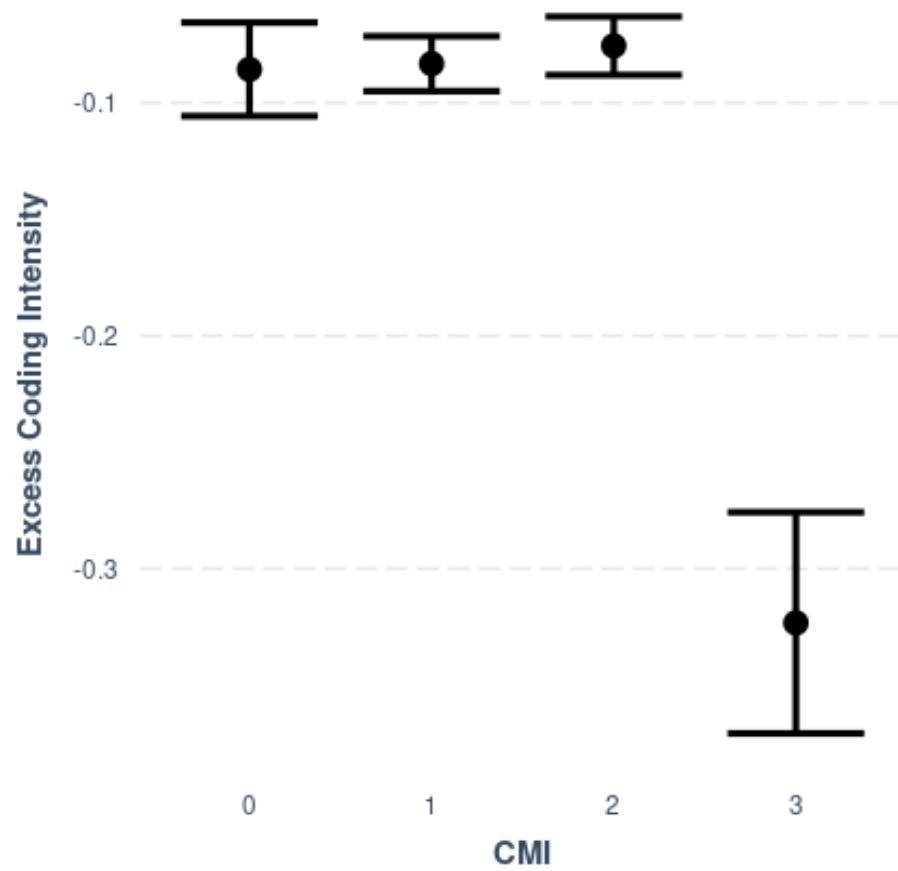

Figure S8. Effect plot of excess coding intensity by facility teaching status

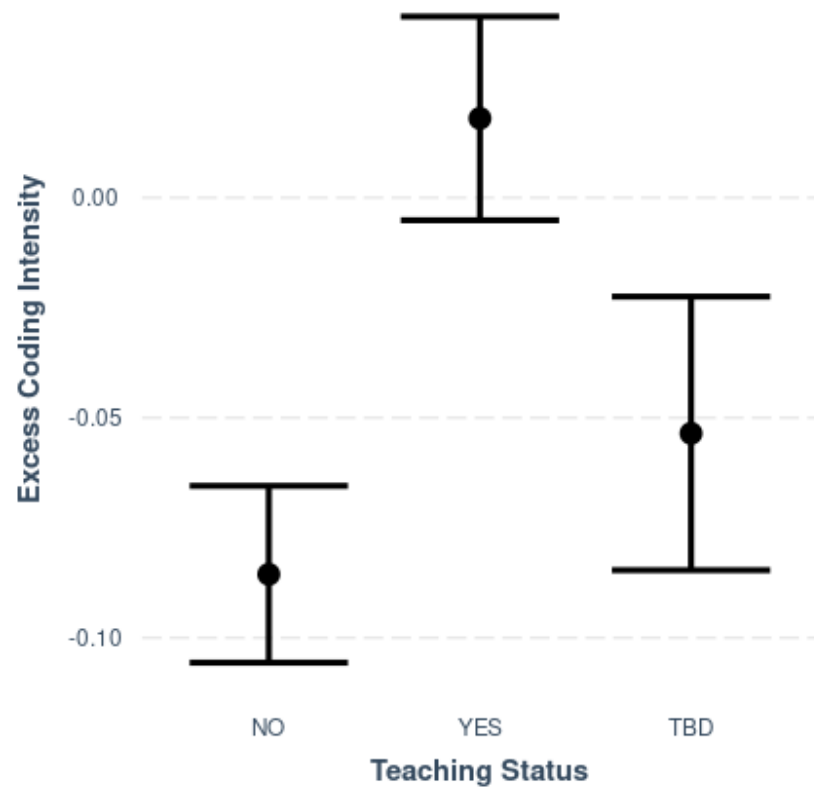

Figure S9. Effect plot of excess coding intensity by facility academic status

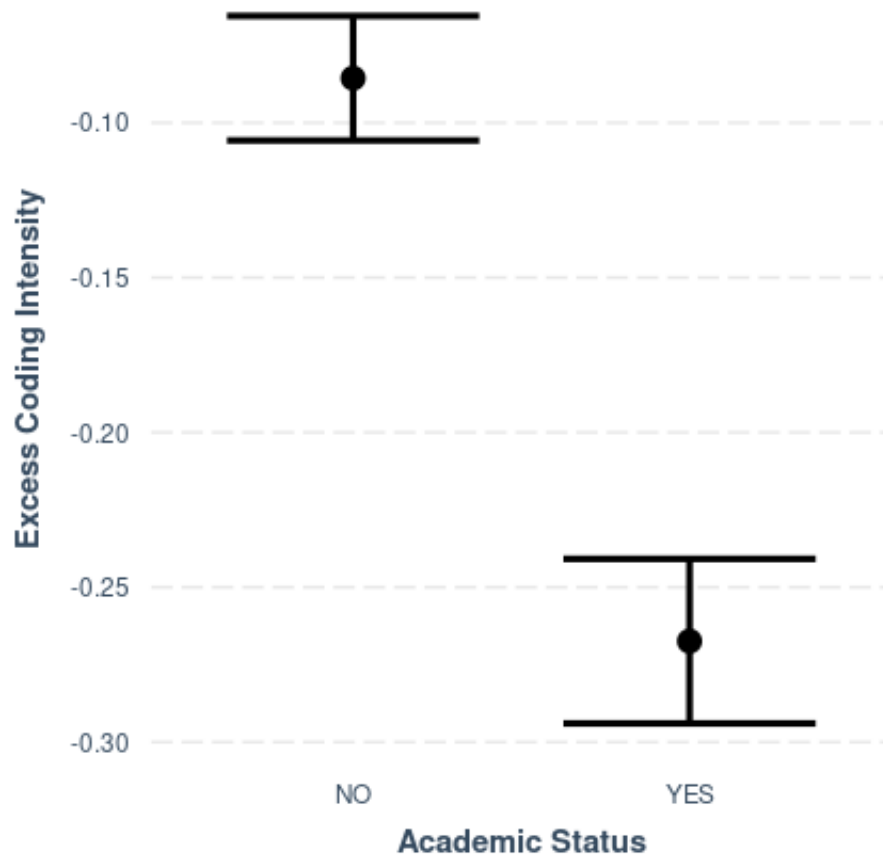

Figure S10. Effect plot of excess coding intensity by facility U.S. Census regional division

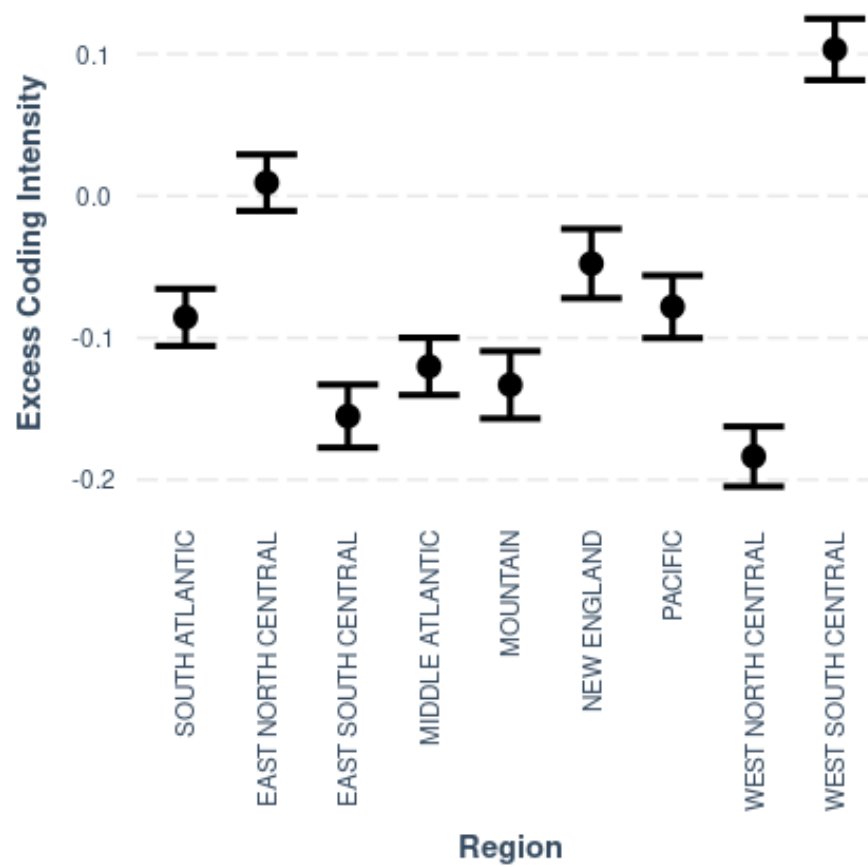

Figure S11. Effect plot of excess coding intensity by facility bed count

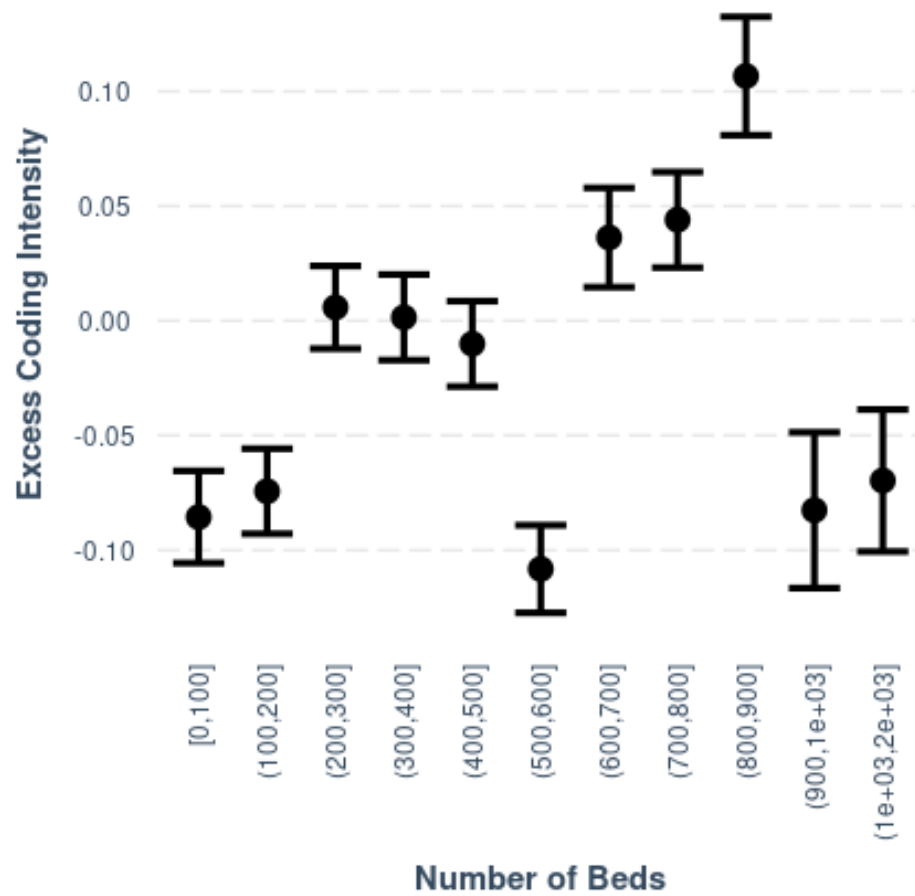

Figure S12. Heatmap of AAECI seasonality by admission month and facility region based on the U.S. Census Bureau definition of 9 regional divisions

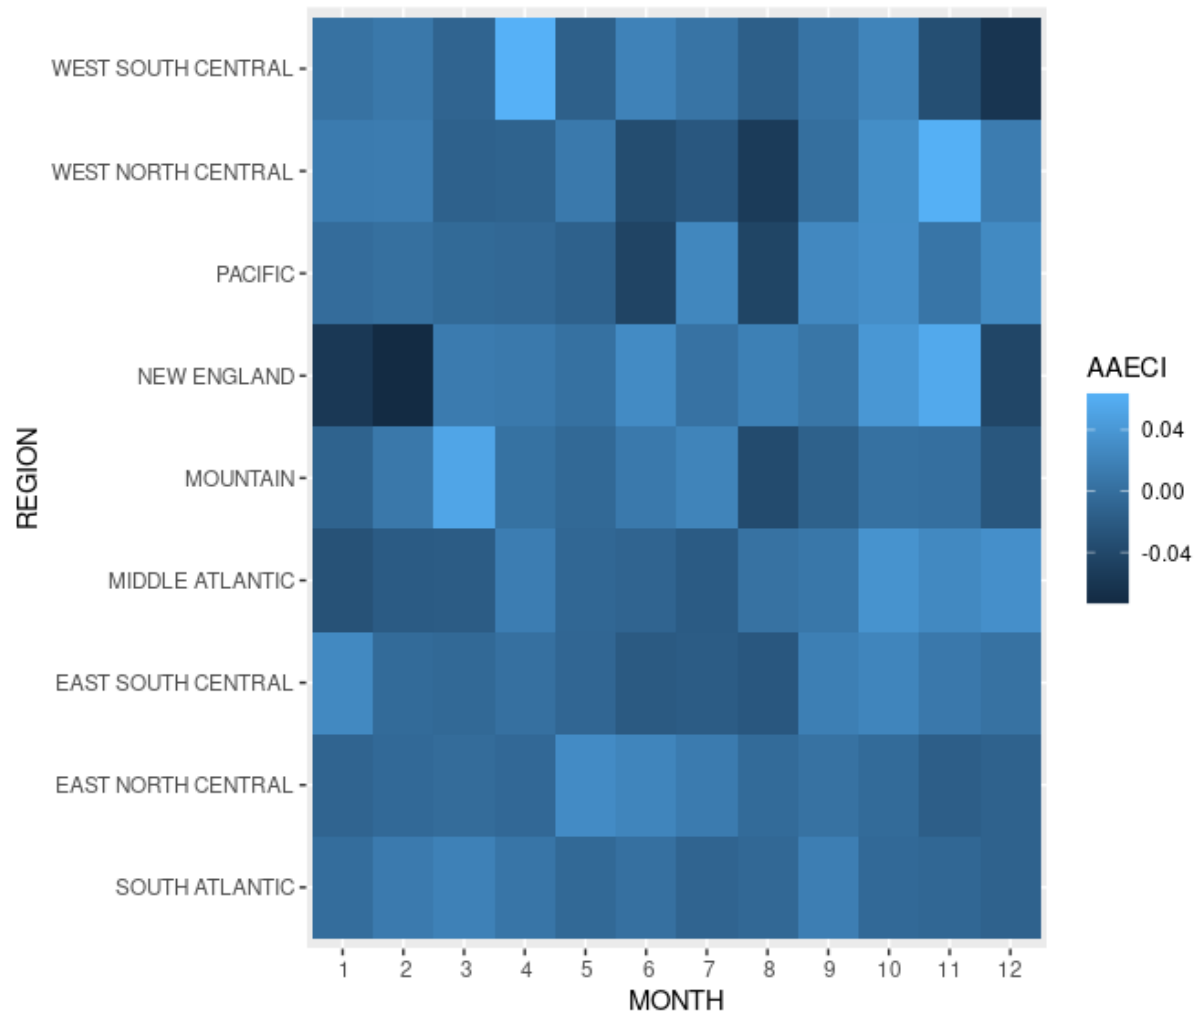

Figure S13. Effect plot of adjusted excess coding intensity (AECI) by facility

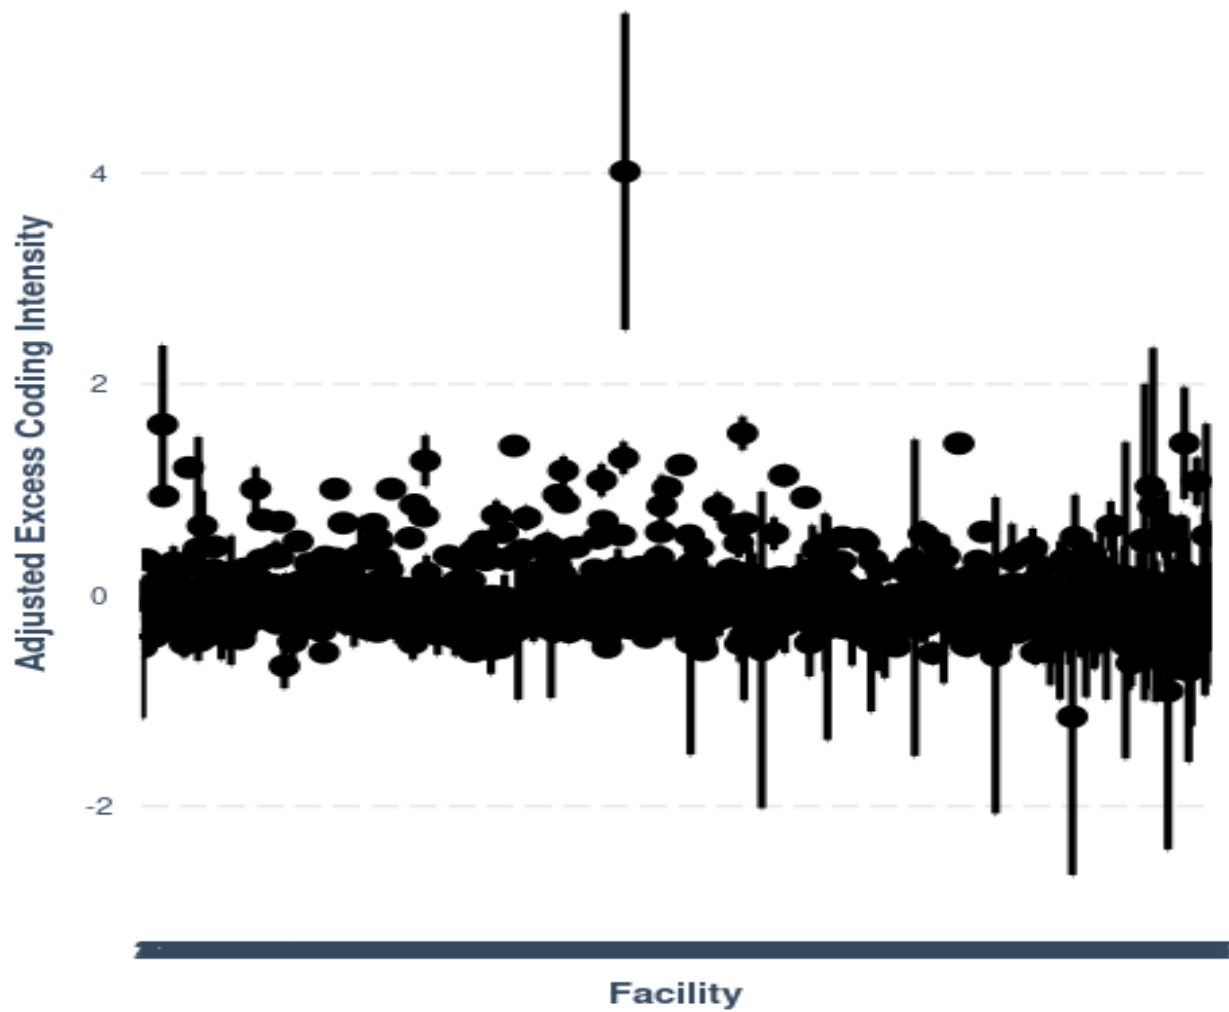



Figure S14. Sorted dot plot of adjusted excess coding intensity (AECI) across facilities

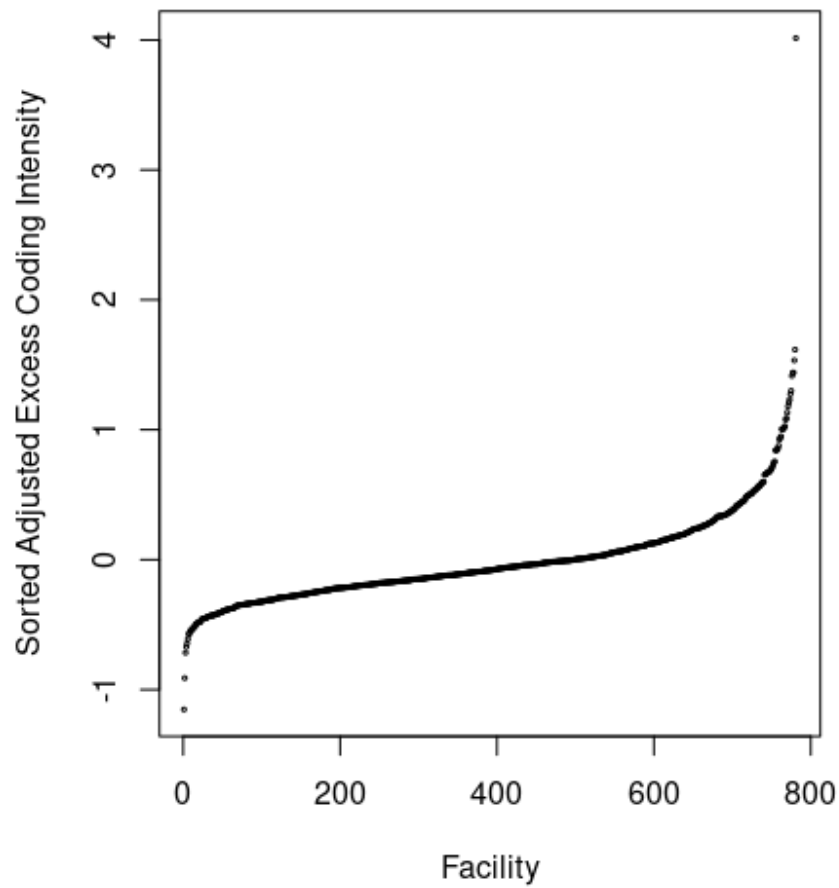

Supplement: s1 [file s1]
